# Supplementary material
Source: PubMed Central journal article supplement (PMC10084790)
Supplement: NIHMS1867052-supplement-Supplementary_Info.pdf [file NIHMS1867052-supplement-Supplementary_Info.pdf]

## SUPPLEMENTARY MATERIAL

**Supplementary Table 1: Most recent treatments prior to BMT**

| <b>Treatment</b>       | <b>N (%)</b> |
|------------------------|--------------|
| JAK inhibitor alone    | 40 (58)      |
| HMA + JAK inhibitor    | 10 (14)      |
| HMA alone              | 4 (6)        |
| Induction chemotherapy | 1 (1)        |
| Other                  | 10 (14)      |
| None                   | 4 (6)        |

BMT: Blood or Marrow Transplantation; HMA: Hypomethylating agent; JAK: Janus kinase

**Supplementary Table 2: Conditioning Regimens**

| <b>Conditioning Regimen Intensity</b> | <b>Regimen</b>                                              | <b>N (%)</b> |
|---------------------------------------|-------------------------------------------------------------|--------------|
| MAC (N=5; 7%)                         | Busulfan + Fludarabine                                      | 2 (3)        |
|                                       | Fludarabine + Melphalan (140 mg/m <sup>2</sup> ) + Thiotepa | 2 (3)        |
|                                       | Fludarabine + Busulfan + Cyclophosphamide                   | 1 (1)        |
| RIC (N=37; 54%)                       | Fludarabine + Cyclophosphamide + TBI (4 Gy)                 | 12 (17)      |
|                                       | Fludarabine + Busulfan (6.4 mg/kg) + TBI (2 Gy)             | 10 (14)      |
|                                       | Fludarabine + Busulfan (6.4 mg/kg) + Thiotepa               | 8 (12)       |
|                                       | Fludarabine + Melphalan (100 mg/m <sup>2</sup> ) + Thiotepa | 3 (4)        |
|                                       | Fludarabine + Melphalan                                     | 2 (3)        |
|                                       | Fludarabine + Melphalan + TBI (2 Gy)                        | 1 (1)        |
|                                       | Fludarabine + Busulfan (2 mg/kg)                            | 1 (1)        |

|                 |                                             |         |
|-----------------|---------------------------------------------|---------|
| NMA (N=27; 39%) | Fludarabine + Cyclophosphamide + TBI (2 Gy) | 27 (39) |
|-----------------|---------------------------------------------|---------|

Gy: Grays; MAC: Myeloablative Conditioning; NMA: Nonmyeloablative Conditioning; RIC: Reduced Intensity Conditioning; TBI: Total Body Irradiation

### Supplementary Table 3: Effect of spleen size at BMT on outcomes

| Spleen Size, cm (N=62) | OS   |           |         | RFS  |           |         | GRFS |           |         |
|------------------------|------|-----------|---------|------|-----------|---------|------|-----------|---------|
|                        | HR   | CI        | P-value | HR   | CI        | P-value | HR   | CI        | P-value |
| per 5 cm increase      | 0.99 | 0.58-1.70 | 0.98    | 1.21 | 0.79-1.86 | 0.38    | 0.98 | 0.68-1.40 | 0.90    |
| ≥20/<20 cm             | 0.89 | 0.32-2.47 | 0.83    | 0.94 | 0.42-2.15 | 0.89    | 1.06 | 0.54-2.08 | 0.87    |
| ≥21/<21 cm             | 0.46 | 0.13-1.62 | 0.23    | 0.71 | 0.29-1.74 | 0.45    | 0.74 | 0.35-1.56 | 0.43    |
| ≥22/<22 cm             | 0.72 | 0.20-2.58 | 0.62    | 1.40 | 0.58-3.39 | 0.45    | 0.69 | 0.30-1.59 | 0.38    |
| ≥23/<23 cm             | 0.90 | 0.25-3.22 | 0.87    | 1.87 | 0.78-4.53 | 0.16    | 0.92 | 0.40-2.12 | 0.85    |
| ≥24/<24 cm             | 0.35 | 0.04-2.66 | 0.31    | 1.59 | 0.59-4.27 | 0.36    | 0.84 | 0.33-2.19 | 0.73    |
| ≥25/<25 cm             | 0.61 | 0.08-4.72 | 0.64    | 2.00 | 0.68-5.92 | 0.21    | 1.14 | 0.40-3.25 | 0.81    |

| Spleen Size, cm (N=62) | NRM  |           |         | Relapse     |                  |              |
|------------------------|------|-----------|---------|-------------|------------------|--------------|
|                        | HR   | CI        | P-value | HR          | CI               | P-value      |
| per 5 cm increase      | 0.94 | 0.56-1.61 | 0.83    | <b>1.90</b> | <b>1.00-3.58</b> | <b>0.049</b> |
| ≥20/<20 cm             | 0.85 | 0.29-2.51 | 0.77    | 1.52        | 0.42-5.53        | 0.52         |
| ≥21/<21 cm             | 0.35 | 0.07-1.65 | 0.18    | 2.25        | 0.62-8.12        | 0.22         |
| ≥22/<22 cm             | 0.57 | 0.12-2.73 | 0.48    | <b>4.57</b> | <b>1.31-16.0</b> | <b>0.017</b> |
| ≥23/<23 cm             | 0.73 | 0.15-3.50 | 0.69    | <b>6.00</b> | <b>1.76-20.4</b> | <b>0.004</b> |
| ≥24/<24 cm             | 0.46 | 0.06-3.59 | 0.46    | <b>5.30</b> | <b>1.58-17.7</b> | <b>0.007</b> |
| ≥25/<25 cm             | 0.82 | 0.10-6.52 | 0.85    | <b>4.27</b> | <b>1.22-15.0</b> | <b>0.023</b> |

BMT: Blood or Marrow Transplantation; CI: 95% Confidence intervals; GRFS: GVHD-free relapse-free survival; HR: Hazard ratio; NRM: Non-relapse mortality; OS: Overall survival; RFS: Relapse free survival
